# Supplementary material for: Nicotinamide Adenine Dinucleotide Precursor Suppresses Hepatocellular Cancer Progression in Mice
Source: MDPI journal article supplement (doi:10.3390/nu15061447), 2023-03-17
Supplement: s1 [file s1]

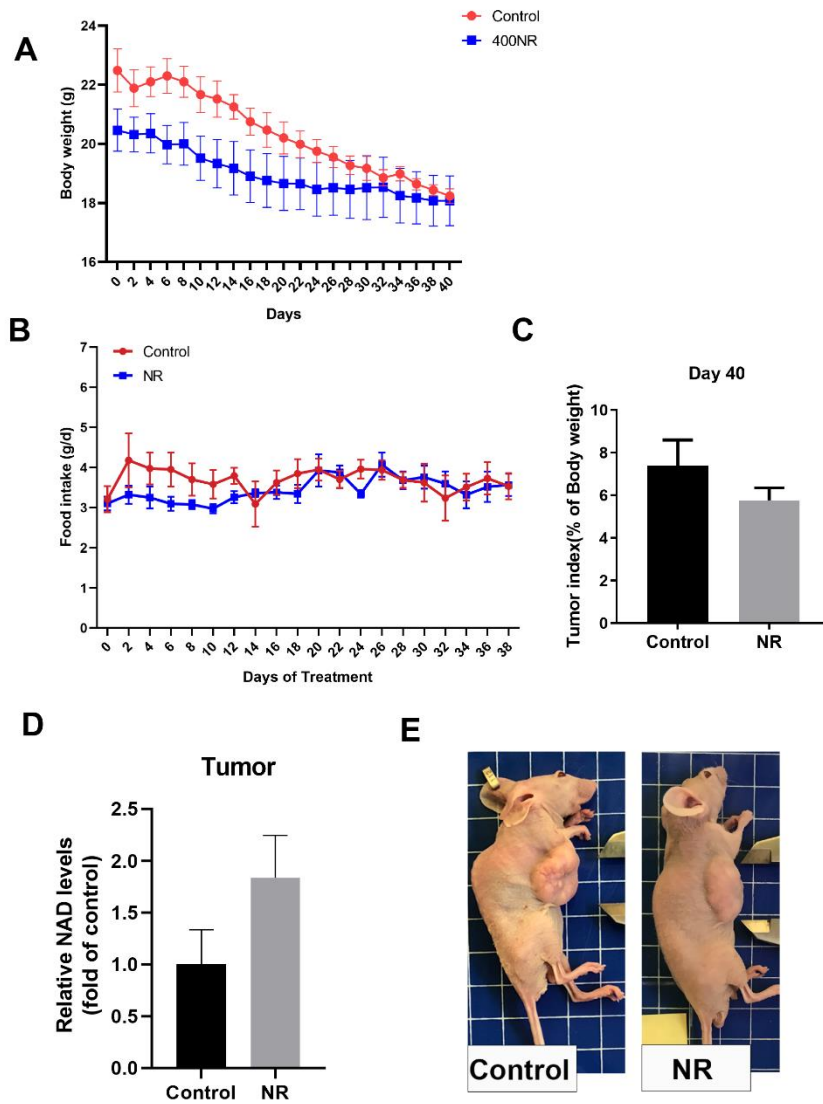

**Figure S1. NR inhibited weight loss in tumor-bearing mice but not subcutaneous tumor growth.**

- (A). Body weight curves of the mice during the intervention period.
- (B). Daily food intakes of the mice during the intervention period.
- (C). NR did not suppress tumor growth in immunodeficient mice.
- (D). NAD levels in tumor tissues of mice.
- (E). Respective photo of mice in two groups.

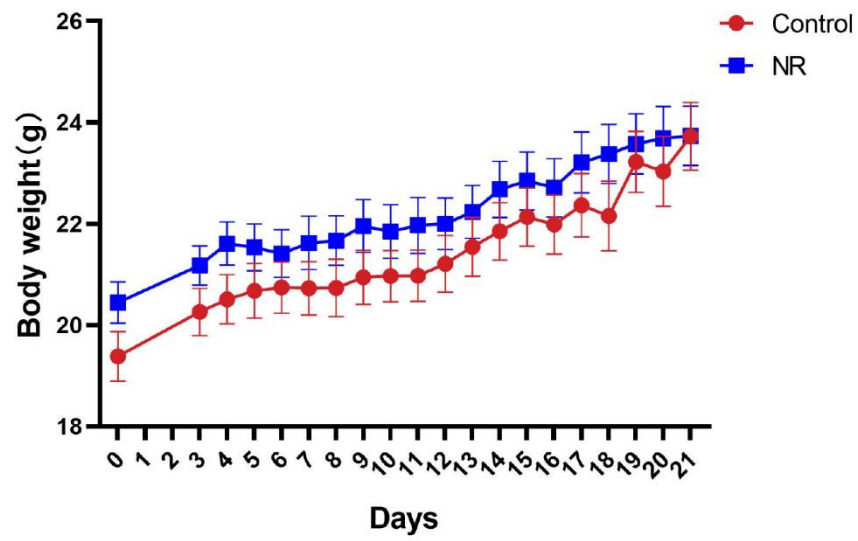

Figure S2. Body weight curves of the mice during the intervention period.

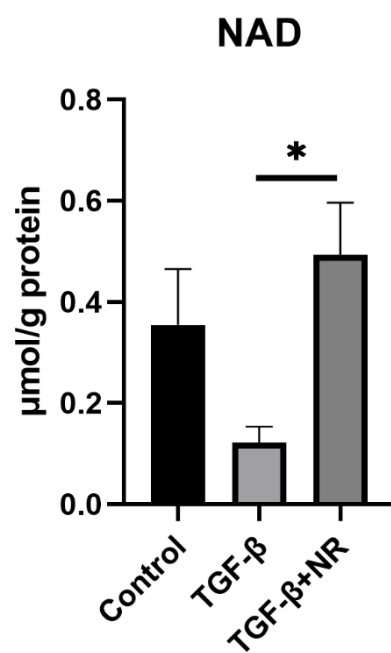

**Figure S3. NAD levels in HepG2 cells. \*  $p < 0.05$**

**Table S1. The demographic and pathological characteristics of patients recruited in this study.**

| The demographic and pathological characteristics of patients (n=38) |              |
|---------------------------------------------------------------------|--------------|
| Gender                                                              |              |
| Male                                                                | 33           |
| Female                                                              | 5            |
| Age                                                                 | 55.71±10.684 |
| Virus infection                                                     |              |
| Hepatitis B                                                         | 17           |
| Hepatitis C                                                         | 1            |
| None                                                                | 20           |
| AFP (ng/ml)                                                         |              |
| <25.0                                                               | 8            |
| >25.0                                                               | 6            |
| Missing <sup>a</sup>                                                | 24           |

<sup>a</sup> Missing means missing of tracking data.
